# Supplementary material for: Synthesis of a large area ReS2 thin film by CVD for in-depth investigation of resistive switching: effects of metal electrodes, channel width and noise behaviour
Source: Royal Society of Chemistry journal article supplement (doi:10.1039/d3nr02566g), 2023-01-01
Supplement: d3nr02566g1.pdf [file d3nr02566g1.pdf]

## Supplementary Information

### **Synthesis of large area ReS<sub>2</sub> thin film by CVD for in-depth investigation of resistive switching: effect of metal electrode, channel width and noise behaviour**

Pallavi Aggarwal<sup>1,3</sup>, Hardhyan Sheoran<sup>1</sup>, Prashant Bisht<sup>1</sup>, Om Kumar Prasad<sup>3</sup>, Chin-Han Chung<sup>3</sup>, Edward Yi Chang<sup>3</sup>, Bodh Raj Mehta<sup>1,4</sup>, and Rajendra Singh<sup>\*1,2</sup>

\*Corresponding author

**E-mail:** rsingh@physics.iitd.ac.in

1 Department of Physics, Indian Institute of Technology Delhi, New Delhi-110016, India

2 Department of Electrical Engineering, Indian Institute of Technology Delhi, New Delhi-110016, India

3 International College of Semiconductor Technology, National Yang Ming Chiao Tung University, Hsinchu City-300093, Taiwan

4 Directorate of Research, Innovation and Development, Jaypee Institute of Information technology, Noida (U.P.), 201309, India

## Section S1

### XPS Fitting

X-ray photoelectron spectroscopy (XPS) was performed using the PHI Versa probe III system with a monochromatic X-ray source of Al K $\alpha$  ( $h\nu = 1486.6$  eV). XPS data was obtained over a  $500 \times 500 \mu\text{m}^2$  area and with an analyser pass energy of 20 eV. All the XPS spectra were fitted in CasaXPS software after subtraction of a Shirley background. The spectra have been calibrated for the charging effect with respect to C 1s peak at 284.5 eV, obtained from small amount adventitious carbon present over the film. Gaussian-Lorentzian peak shapes with a 70/30 mix were used for all peaks. Spin-orbit splitting for the Re 4f core level is set to 2.43 eV and for the S 2p core level to 1.18 eV. An area constraint of 4:3 is used for all the peaks corresponding to Re-4f<sub>7/2</sub>:Re-4f<sub>5/2</sub>. Atomic ratio, Re:S is calculated from the Re-4f and S-2p peaks corresponding to ReS<sub>2</sub> in the high resolution scan of Re-4f and S-2p peaks.

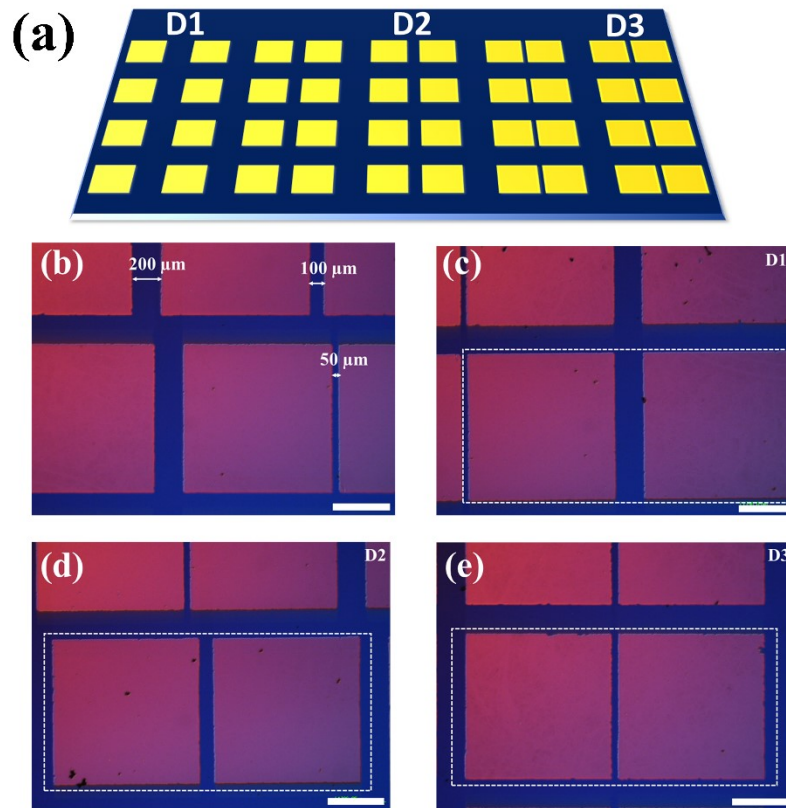

**Figure S1**

*Fig. S1 (a) Schematic of the device architecture. (b) Optical microscopic image depicting overview of the device. It shows presence of devices with 200, 100, and 50  $\mu\text{m}$  channel width all together. Optical microscopic image of (c) D1, (d) D2, and (e) D3. The scale provided in each figure is 400  $\mu\text{m}$ .*

Figure S2

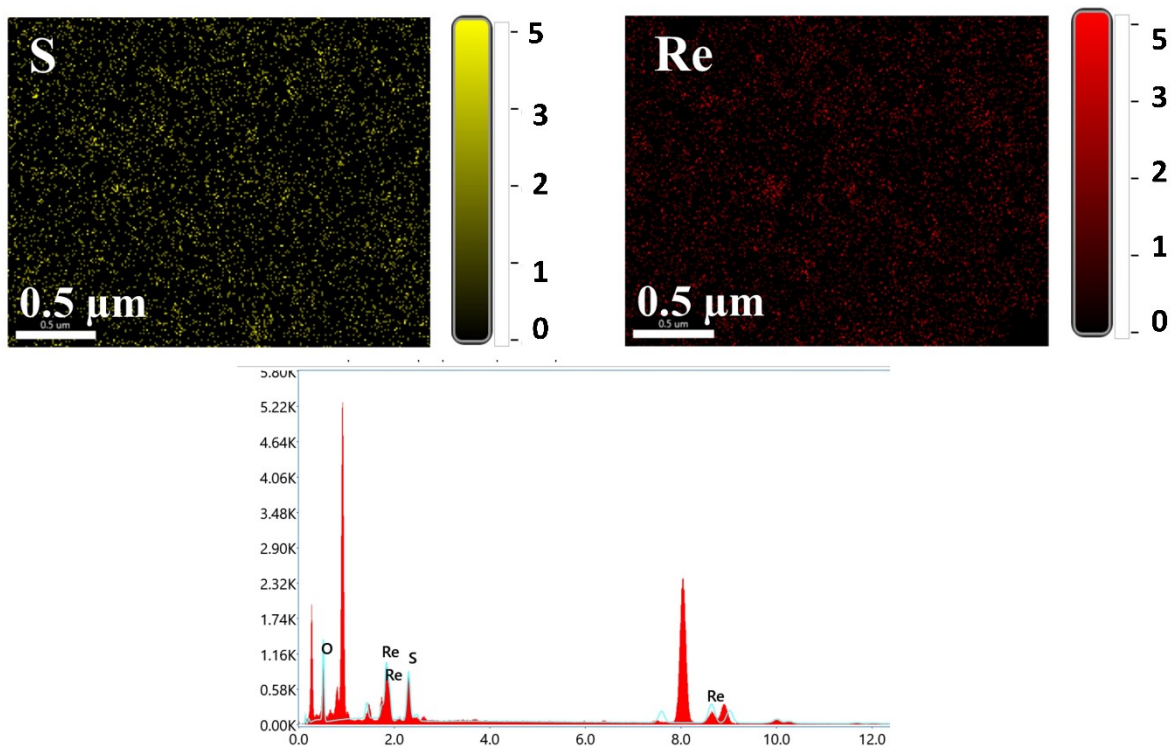

*Fig. S2 EDAX spectra of the as-grown ReS<sub>2</sub> film showing peak signals from Re and S and depicting the atomic ratio, Re:S equal to 1:1.9, thereby indicating the formation of stoichiometric film.*

Figure S3

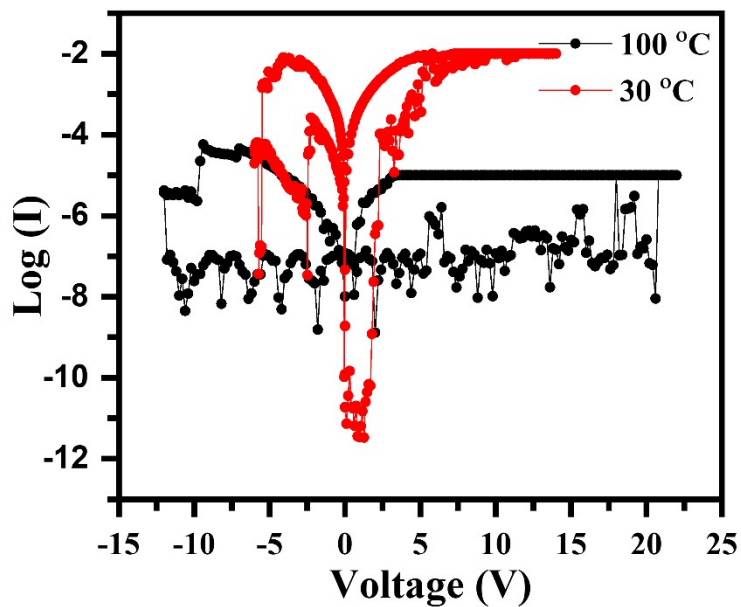

*Fig. S3 Resistive switching cycle for device D2 at 30 and 100 °C. A change in HRS/LRS resistance ratio from  $10^8$  to  $10^3$  is observed which has been attributed to the weakening of Ag filament followed by which the current is dominated by defect mediated charge transport.*

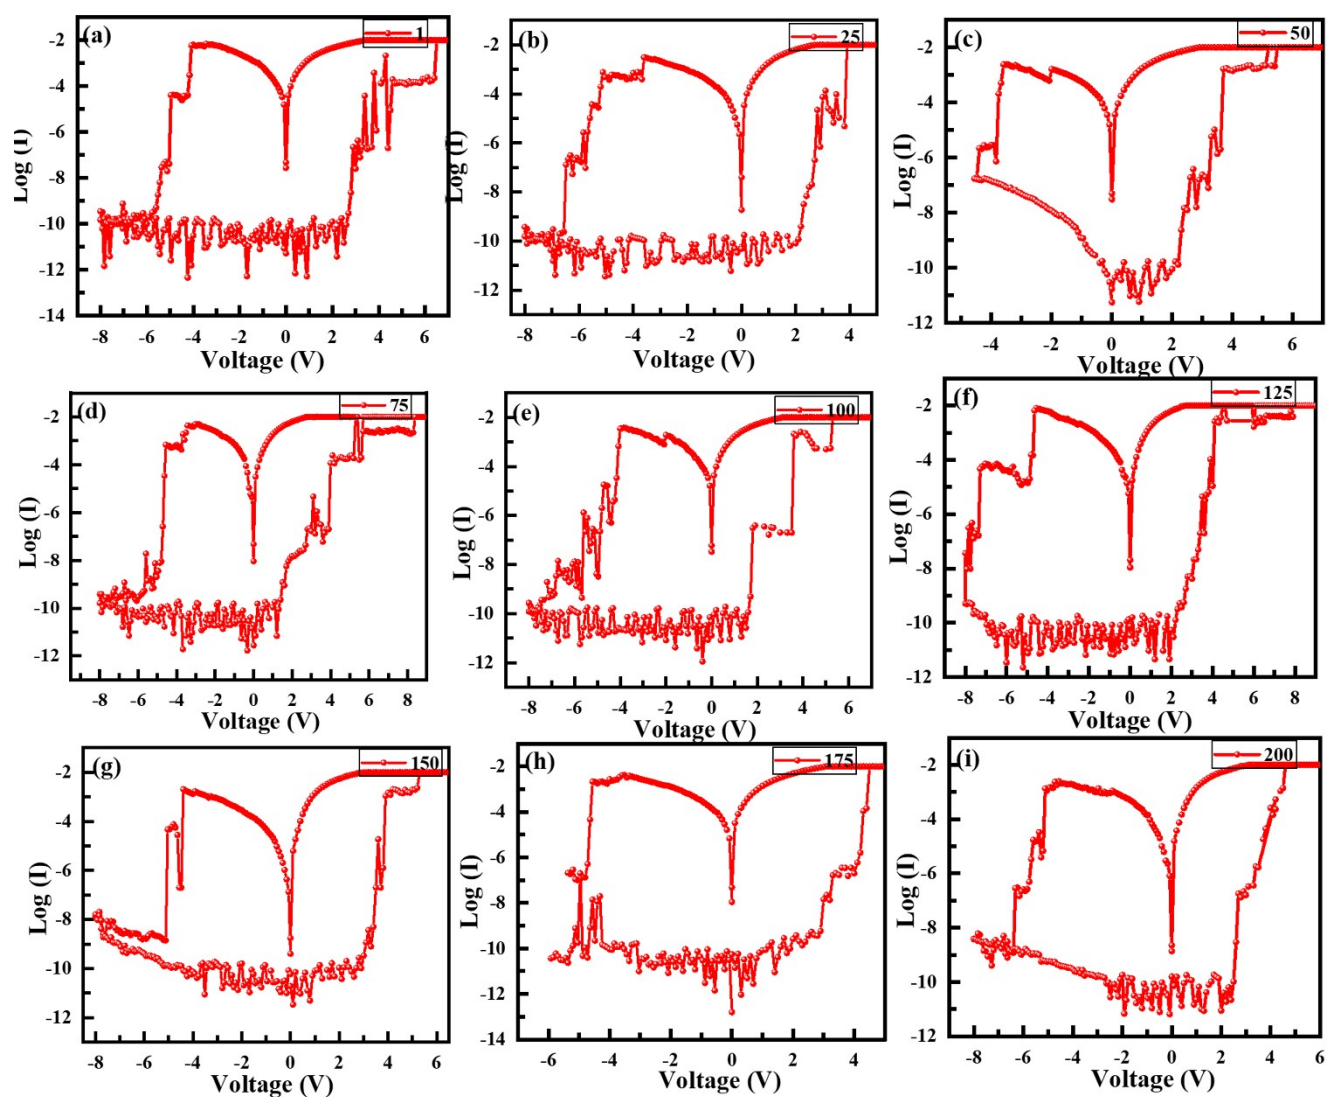

**Figure S4**

*Fig. S4 RS cycles for D1 at the interval of 25 cycles. (a) 1<sup>st</sup> cycle, (b) 25<sup>th</sup> cycle, (c) 50<sup>th</sup> cycle, (d) 75<sup>th</sup> cycle, (e) 100<sup>th</sup> cycle, (f) 125<sup>th</sup> cycle, (g) 150<sup>th</sup> cycle, (h) 175<sup>th</sup> cycle, and (i) 200<sup>th</sup> cycle.*



**Figure S5**

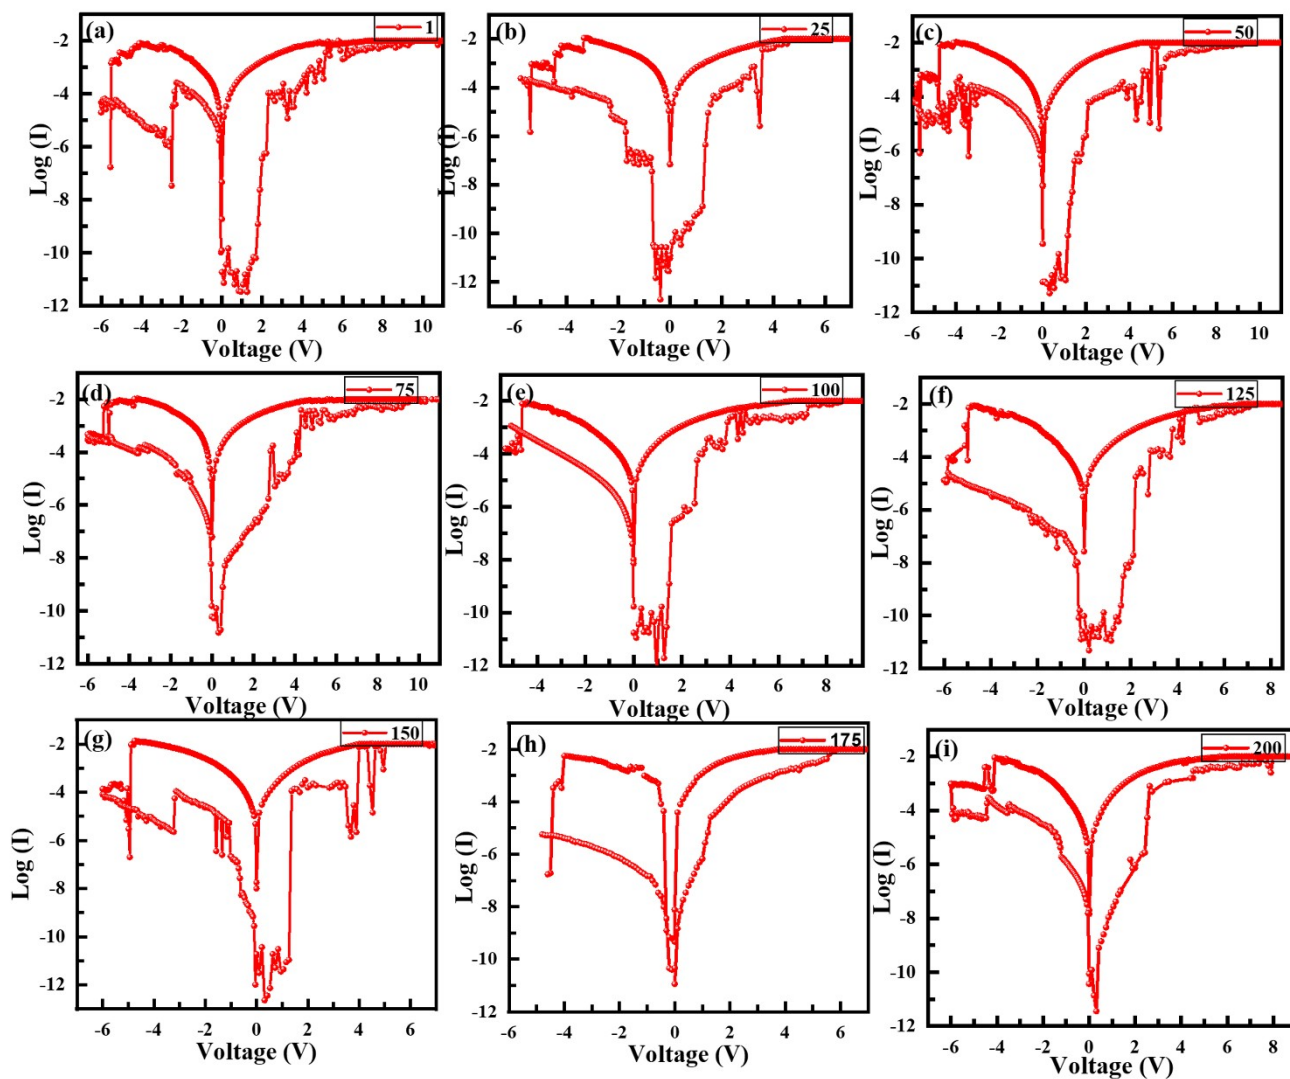

*Fig. S5 RS cycles for D2 at the interval of 25 cycles. (a) 1<sup>st</sup> cycle, (b) 25<sup>th</sup> cycle, (c) 50<sup>th</sup> cycle, (d) 75<sup>th</sup> cycle, (e) 100<sup>th</sup> cycle, (f) 125<sup>th</sup> cycle, (g) 150<sup>th</sup> cycle, (h) 175<sup>th</sup> cycle, and (i) 200<sup>th</sup> cycle.*



**Figure S6**

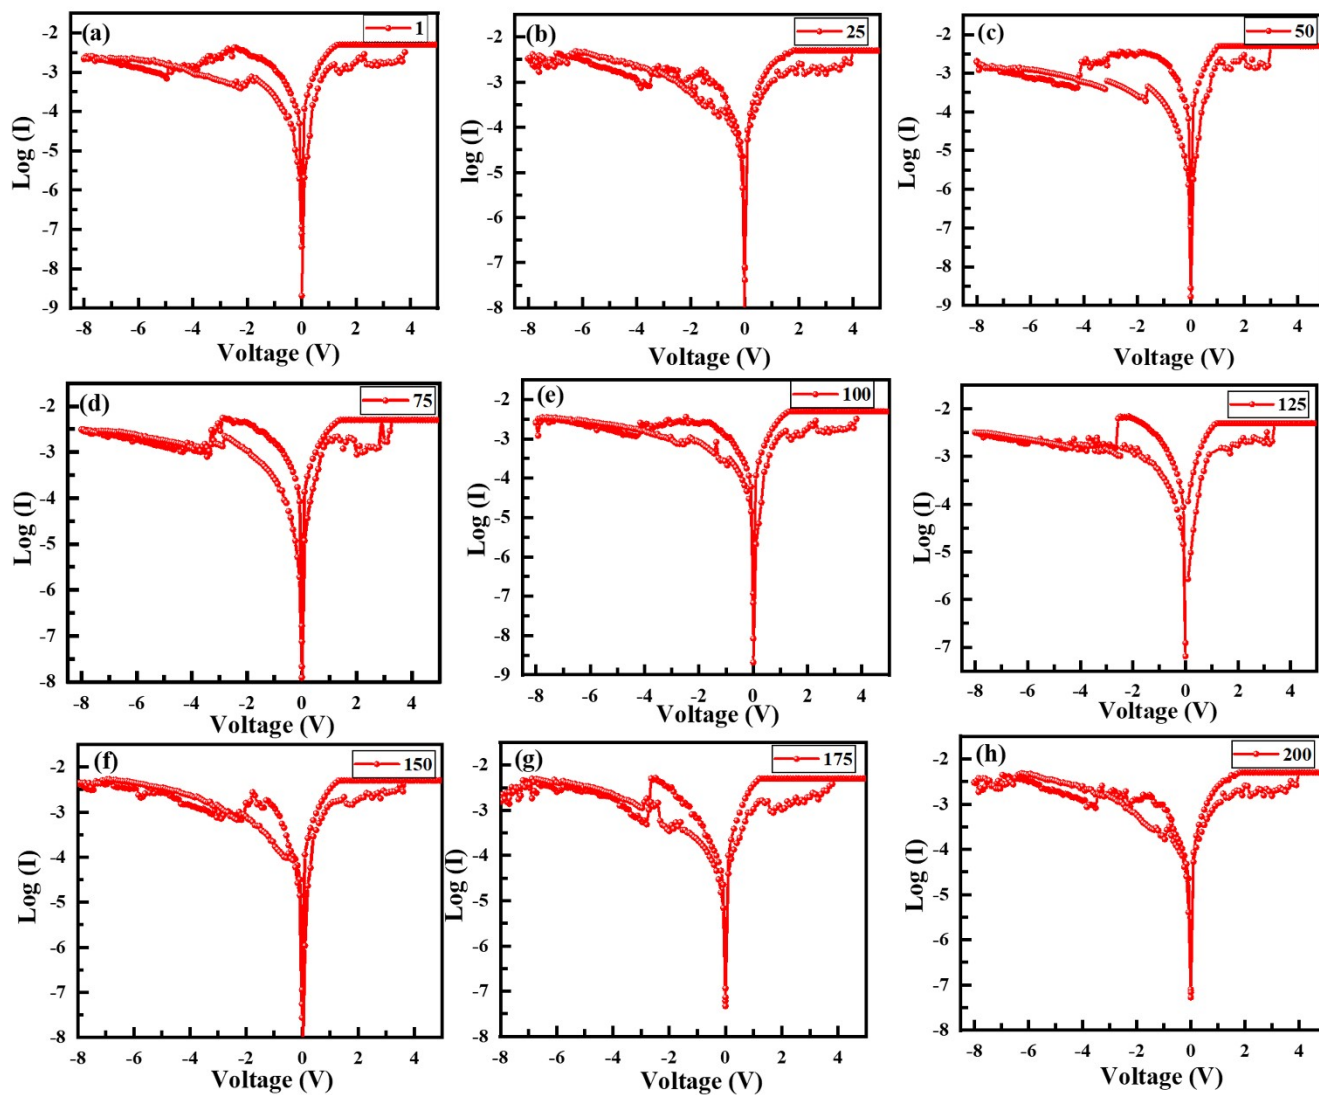

*Fig. S6 RS cycles for D3 at the interval of 25 cycles. (a) 1<sup>st</sup> cycle, (b) 25<sup>th</sup> cycle, (c) 50<sup>th</sup> cycle, (d) 75<sup>th</sup> cycle, (e) 100<sup>th</sup> cycle, (f) 125<sup>th</sup> cycle, (g) 150<sup>th</sup> cycle, (h) 175<sup>th</sup> cycle, and (i) 200<sup>th</sup> cycle.*

**Figure S7**

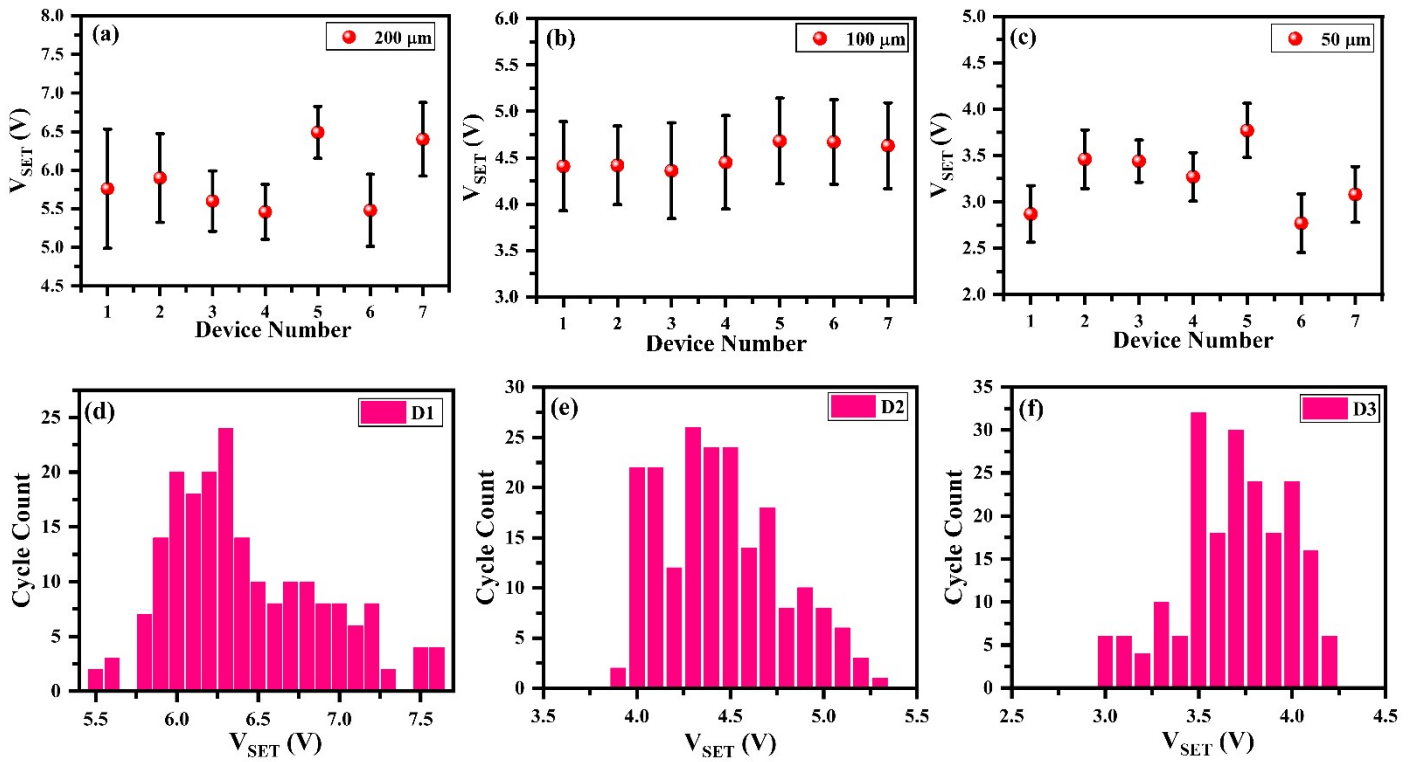

*Fig. S7 Device statistics depicting average of the SET voltage,  $V_{SET}$ , for the tested seven devices with channel length of (a) 200  $\mu\text{m}$ , (b) 100  $\mu\text{m}$ , and (c) 50  $\mu\text{m}$ . Plots clearly indicate increase in  $V_{SET}$  with channel width, which matches with the results reported in the manuscript. Histogram plot representing distribution of  $V_{SET}$  over 200 cycles for (d) D1, (e) D2, and (f) D3.  $V_{SET}$  is  $6.55 \pm 0.63$  V for D1,  $4.6 \pm 0.5$  V for D2, and  $3.6 \pm 0.3$  V. This small value of standard deviation represents device repeatability and stability over multiple cycles.*

**Table T1**

**Table T1. Comparison table containing reported  $R_{HRS}/R_{LRS}$  resistance ratio of memristors fabricated on 2DMs.**

| S.No | Contact Metal                  | Material                           | Geometry | $R_{HRS}/R_{LRS}$                  | Ref              |
|------|--------------------------------|------------------------------------|----------|------------------------------------|------------------|
| 1    | Ti/Au                          | ReS <sub>2</sub>                   | Lateral  | 50                                 | 1                |
| 2    | Ti/Au                          | ReS <sub>2</sub>                   | Vertical | 10 <sup>6</sup>                    | 2                |
| 3    | Au                             | ReS <sub>2</sub>                   | Lateral  | 10 <sup>5</sup>                    | 3                |
| 4    | Au<br>Ag/Au                    | MoS <sub>2</sub>                   | Vertical | -<br>10 <sup>2</sup>               | 4                |
| 5    | Cu/ReSe <sub>2</sub> /graphene | ReS <sub>2</sub>                   | Lateral  | 10 <sup>5</sup>                    | 5                |
| 6    | Ag, Cu                         | WS <sub>2</sub>                    | Vertical | 4.2 × 10 <sup>4</sup>              | 6                |
| 7    | Al                             | MoS <sub>2</sub> -MoO <sub>x</sub> | Vertical | 10 <sup>8</sup>                    | 7                |
| 8    | Au, Cr/Au                      | hBN                                | Vertical | 10 <sup>7</sup>                    | 8                |
| 9    | Ag/Au<br>Pt/Au                 | ReS <sub>2</sub>                   | Lateral  | 10 <sup>8</sup><br>10 <sup>2</sup> | <b>This Work</b> |

## Reference

- 1 X. Wu, Y. Gu, R. Ge, M. I. Serna, Y. Huang, J. C. Lee and D. Akinwande, *npj 2D Mater. Appl.* 2022 61, 2022, **6**, 1–12.
- 2 M. E. Pam, S. Li, T. Su, Y. C. Chien, Y. Li, Y. S. Ang and K. W. Ang, *Adv. Mater.*, 2022, **34**, 2202722.
- 3 C. Ke, F. Huang, Z. Zhang, X. Li, Z. Wu, C. Zhang, F. Xu, Y. Wu and J. Kang, *Appl. Phys. Express*, , DOI:10.35848/1882-0786/ACC8B6.
- 4 K. Ranganathan, M. Fiegenbaum-Raz and A. Ismach, *Adv. Funct. Mater.*, 2020, **30**, 2005718.
- 5 S. Rehman, H. Kim, M. F. Khan, J. H. Hur, J. Eom and D. kee Kim, *J. Alloys Compd.*, , DOI:10.1016/j.jallcom.2020.157310.
- 6 Q. Cao, P. Zou, P. Li, L. Xiong, H. Bi and J. Wu, *J. Mater. Sci. Mater. Electron.*, , DOI:10.1007/S10854-022-09612-9.
- 7 D. Son, S. I. Chae, M. Kim, M. K. Choi, J. Yang, K. Park, V. S. Kale, J. H. Koo, C. Choi, M. Lee, J. H. Kim, T. Hyeon and D. H. Kim, *Adv. Mater.*, 2016, **28**, 9326–9332.
- 8 X. Wu, R. Ge, P. A. Chen, H. Chou, Z. Zhang, Y. Zhang, S. Banerjee, M. H. Chiang, J. C. Lee and D. Akinwande, *Adv. Mater.*, , DOI:10.1002/ADMA.201806790.
